# Supplementary material for: Experimental model of peri-prosthetic infection of the knee caused by Staphylococcus aureus using biomaterials representative of modern TKA
Source: PubMed Central journal article supplement (PMC6777360; doi:10.1242/bio.045203), 2019-09-15
Supplement: biolopen-8-045203-s1.pdf [file biolopen-8-045203-s1.pdf]

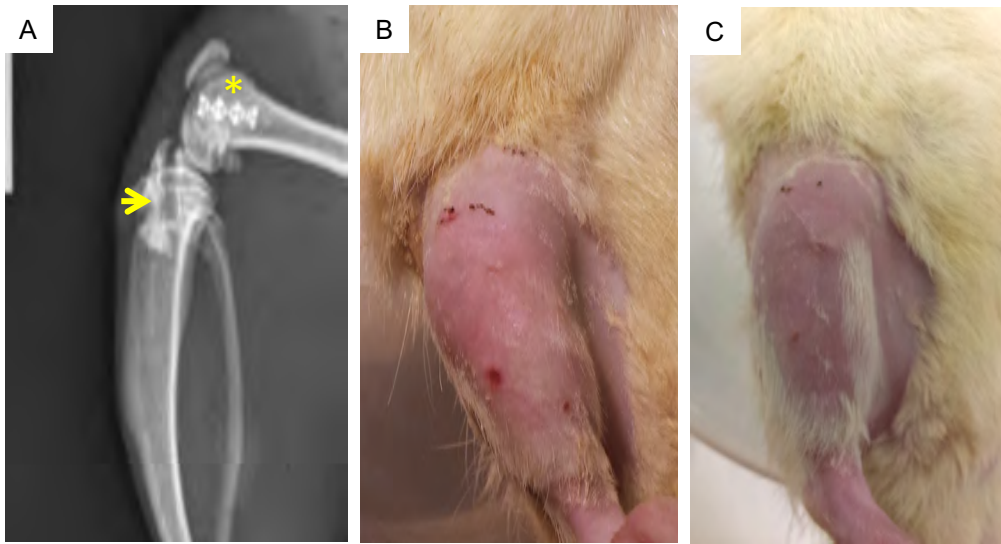

**Figure S1.** A) Representative radiograph of operated knee of a control animal at day 14 post-surgery showing placement of the femoral press-fit titanium implant (asterisk) and cemented tibial UHXLPE implant (arrowhead). Representative images of the surgical incision site of infection animals at B) day 5 and C) day 10 post-surgery.

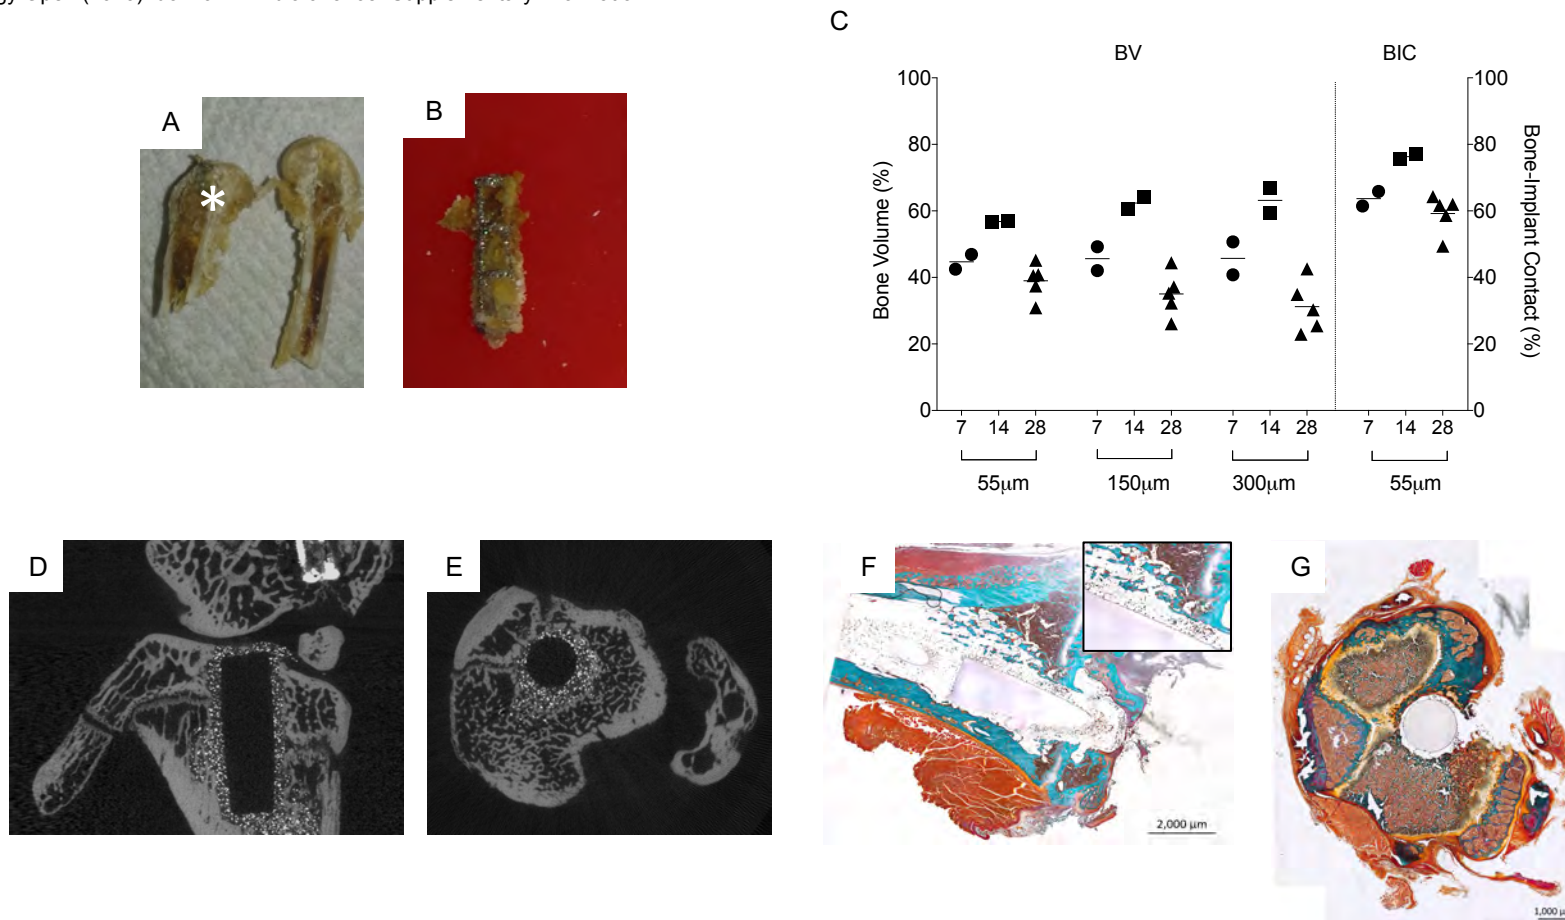

**Figure S2.** Representative image of A) bisected paraformaldehyde-fixed rat femur from control animal at day 14 post-surgery with titanium implant in situ (asterisk). B) Bone ingrowth was evident within the excised femoral titanium implant. C) Percentage bone volume (BV) within peri-implant region of interest set at 55mm, 150mm and 300mm distances from the implant surface and the percentage bone-implant contact (BIC) at day 7, 14 and 28 post-surgery in control animals, as determined by microCT analysis. Data show mean. Representative D) coronal and E) axial microCT scan of the cemented UHXLPE implant within the proximal tibia of a control animal at day 28 post-surgery. F) Representative Goldner trichome-stained resin-embedded F) longitudinal and G) transverse sections from an infected and control animal respectively at day 28 post-surgery showing mature bone matrix (green) and new bone formation (osteoid, red) adjacent to the bone cement mantle encasing the UHXLPE implant.

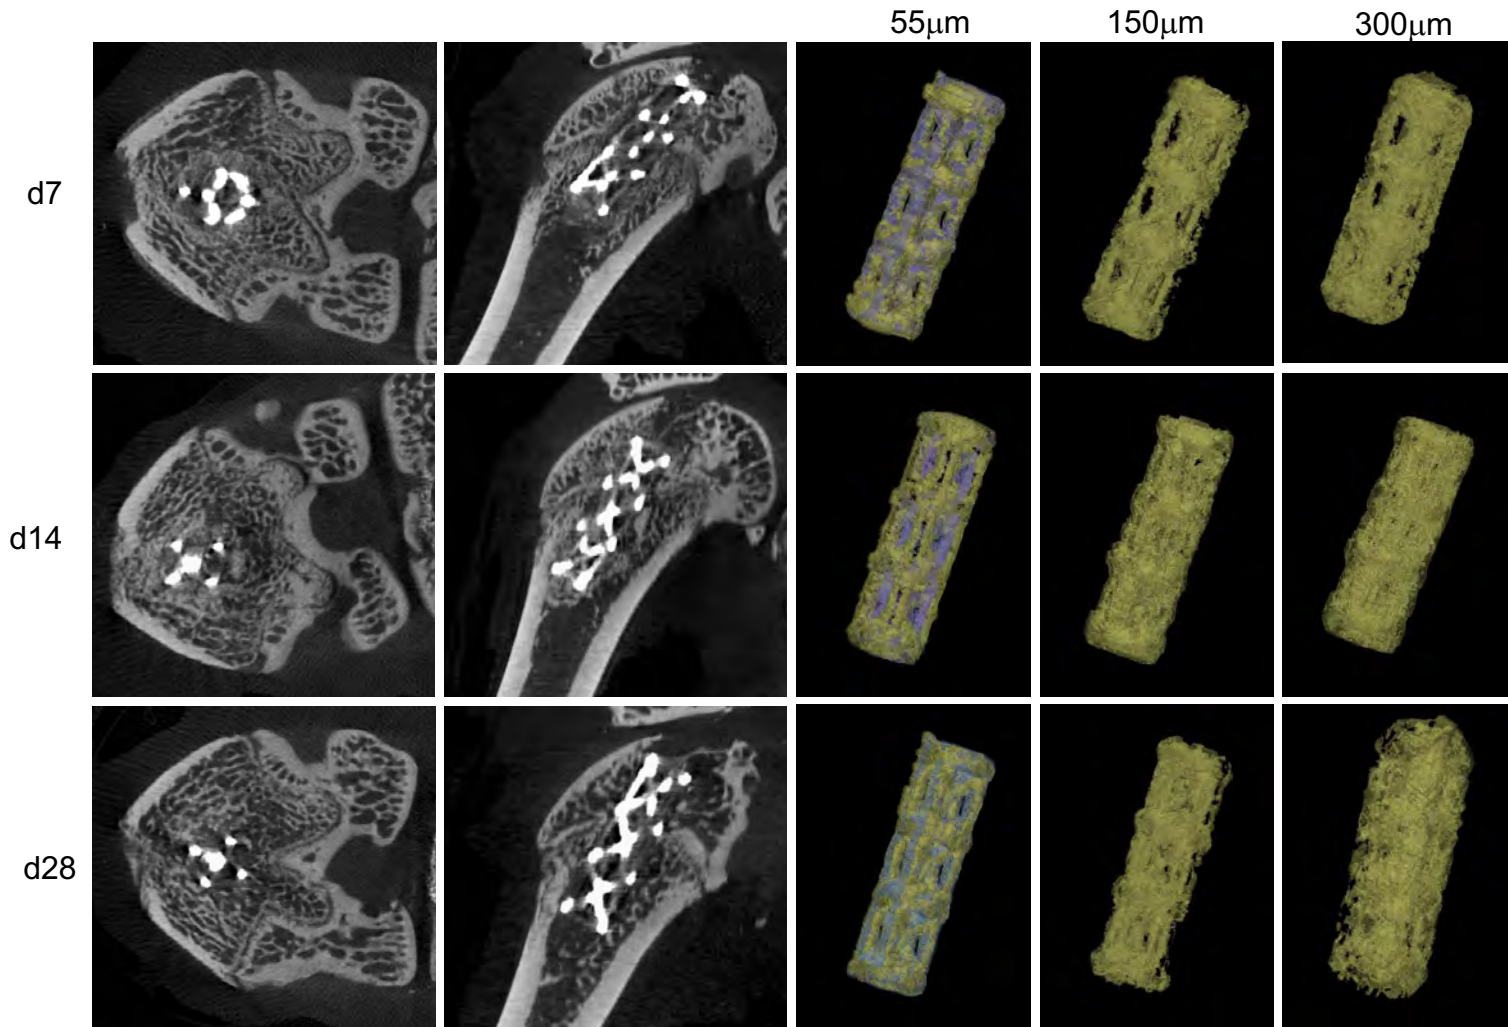

**Figure S3.** Representative 3D reconstructed microCT images of the distal femur of uninfected, control animals at day 7, 14 and 28 post-surgery showing bone contact and regeneration surrounding the press-fit titanium implant within cylindrical regions of interest set at 55mm, 150mm and 300mm from the implant surface (bone – yellow; implant surface – grey).

**Figure S4.** Representative scanning electron microscopy images of *S. aureus* ORI16\_C02N biofilms grown for 24h on titanium implants under *in vitro* culture conditions, prior to (A, B; 750X and 3500X magnification, respectively) and following sonication (C, D; 750X and 2000X magnification, respectively).

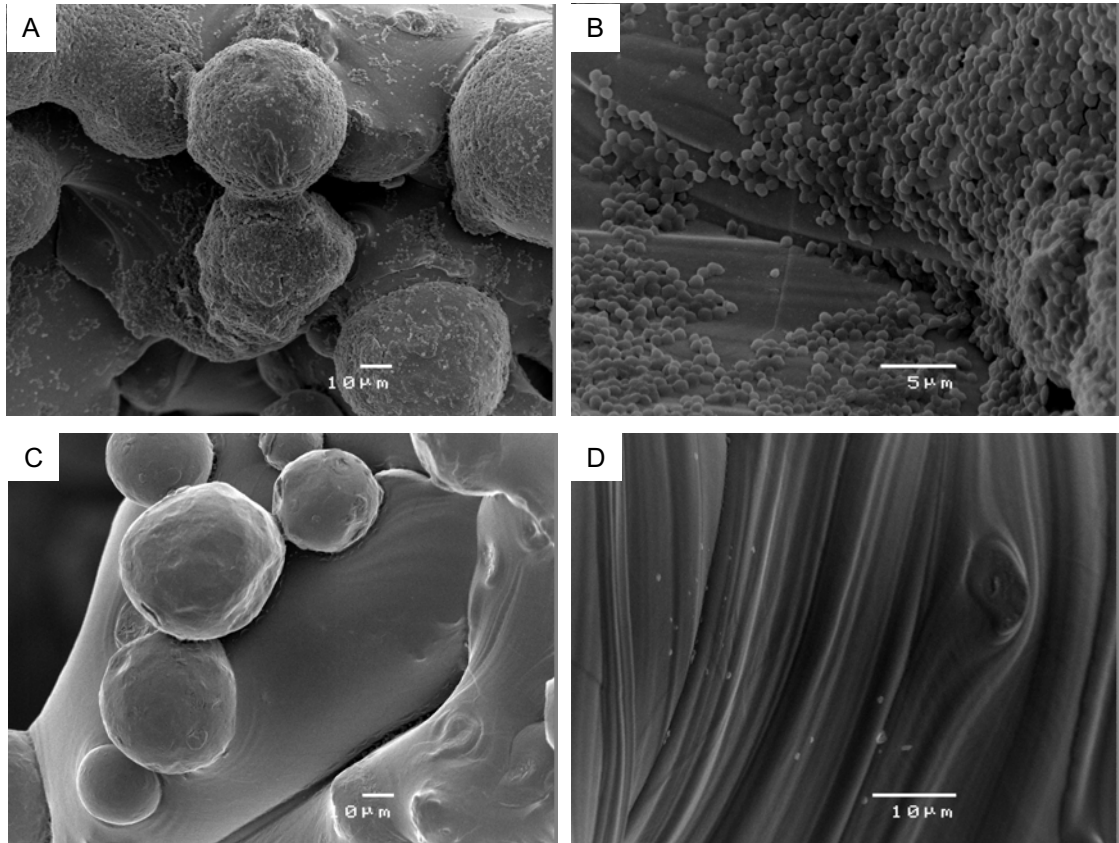

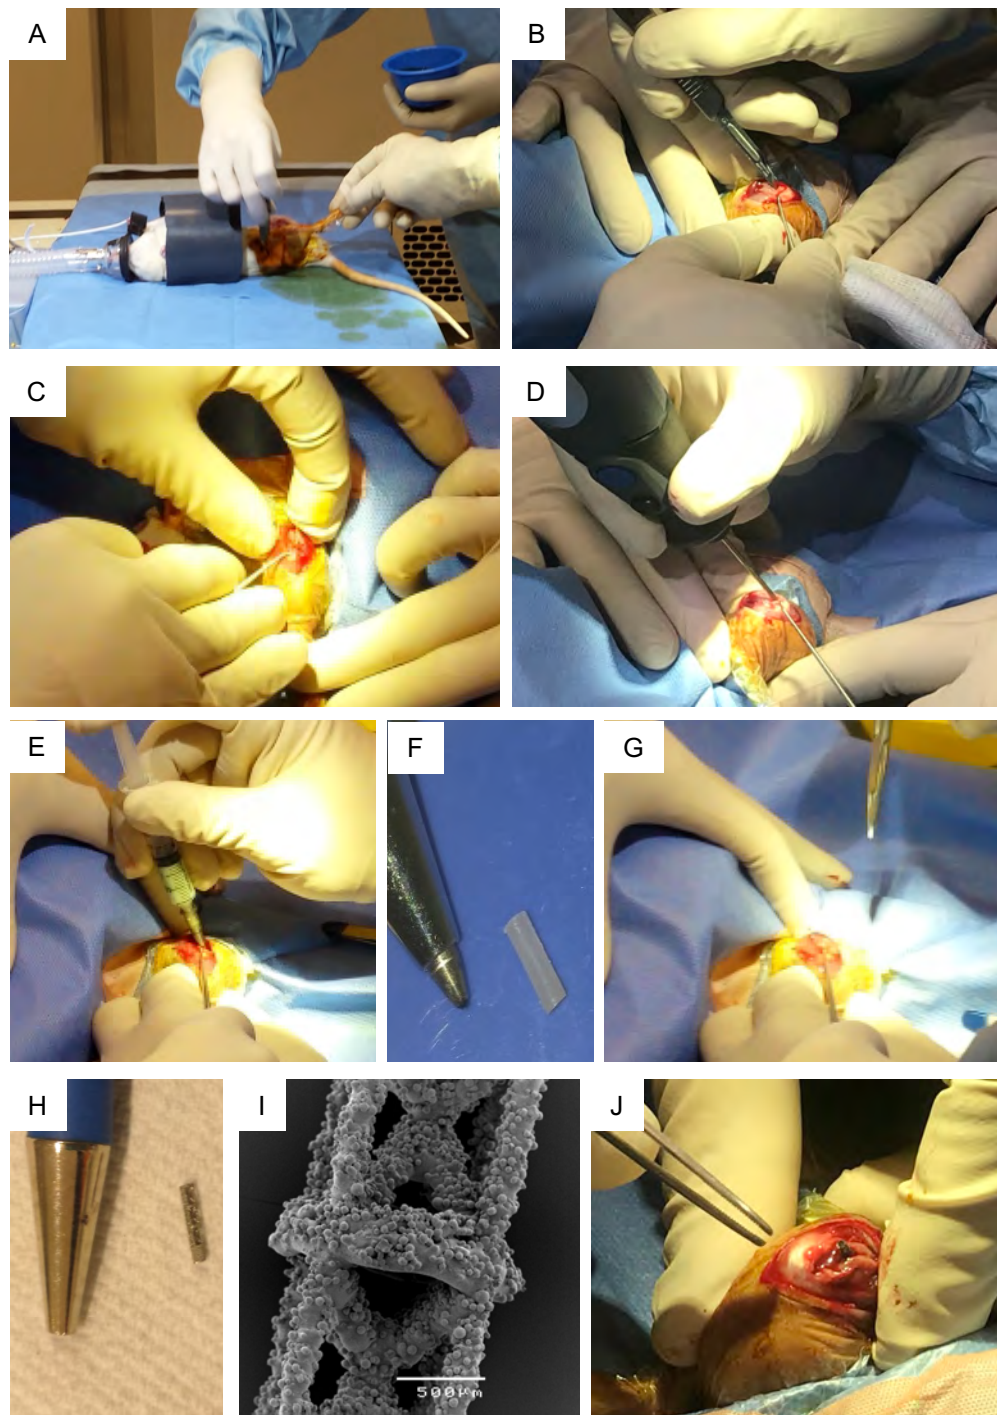

**Figure S5.** Surgical technique for rat model of hybrid fixation knee implant surgery. Male Sprague-Dawley rats were anaesthetised, and hair removed from the right hind leg. A) Skin was disinfected and a sterile field created. B, C) A medial parapatellar approach was used to access the articular space, with the patellar shifted laterally. D) A microdremel was used to create a defect in the proximal tibia and E) bone cement deployed using a cannula and syringe, prior to F, G) insertion of the UHXLPE implant. Following creation of an intercondylar defect in the distal femur with a microdremel, H-J) the titanium implant was press-fit into the bone using sterile forceps.
